# Supplementary material for: sp3-hybridization in superatomic clusters. Analogues to simple molecules involving the Au6core
Source: Royal Society of Chemistry journal article supplement (doi:10.1039/c4sc01719f), 2014-08-05
Supplement: c4sc01719f1.pdf [file c4sc01719f1.pdf]

## SUPPORTING INFORMATION

$sp^3$ -hybridization in superatomic clusters.  
Analogues to simple molecules involving the  $Au_6$   
core.

Content:

Figure S1. Representative Localized Molecular Orbital for superatomic  $SP^3$  hybrid at several levels of theory.

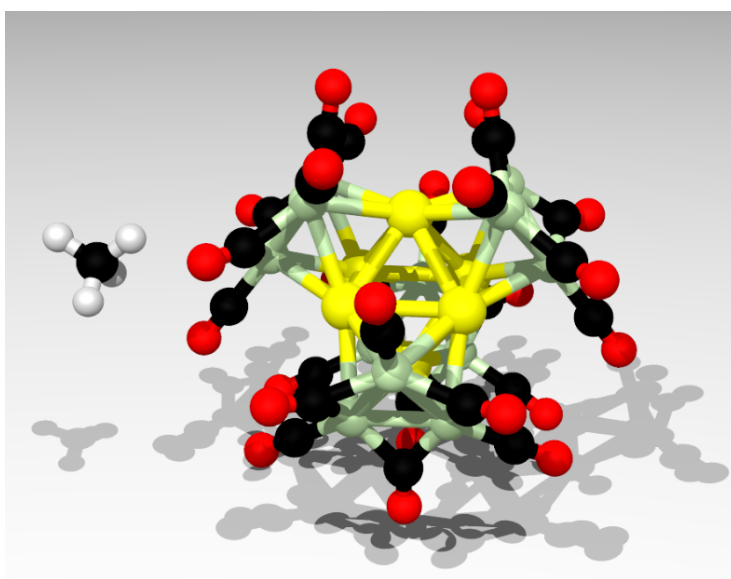

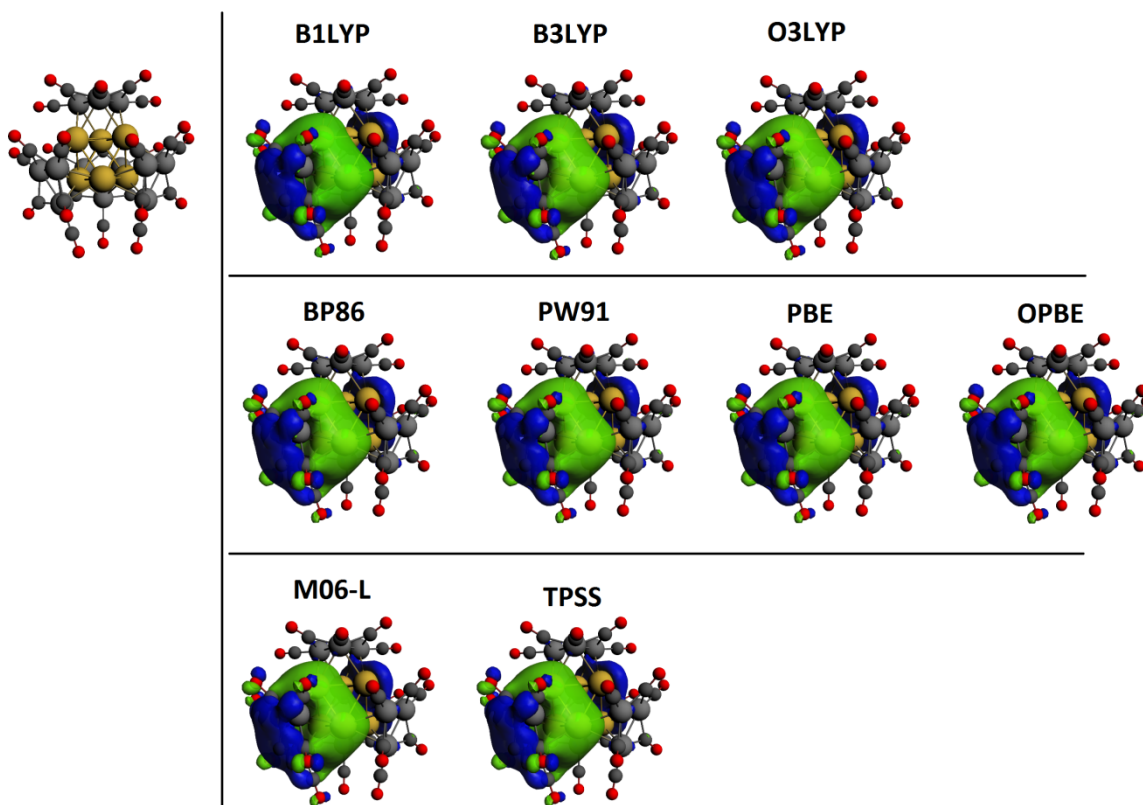

Figure S1. Representative Localized Molecular Orbital for superatomic SP3 hybrids at several levels of theory involving Hybrid, GGA and Meta-GGA functionals, employing STO-TZ2P and ZORA scalar relativistic hamiltonian. Isosurfaces at  $\pm 0.01$  a.u..
